# Supplementary material
Source: PubMed Central journal article supplement (PMC3145727)

# Supporting Information

Pomié et al. 10.1073/pnas.1107136108

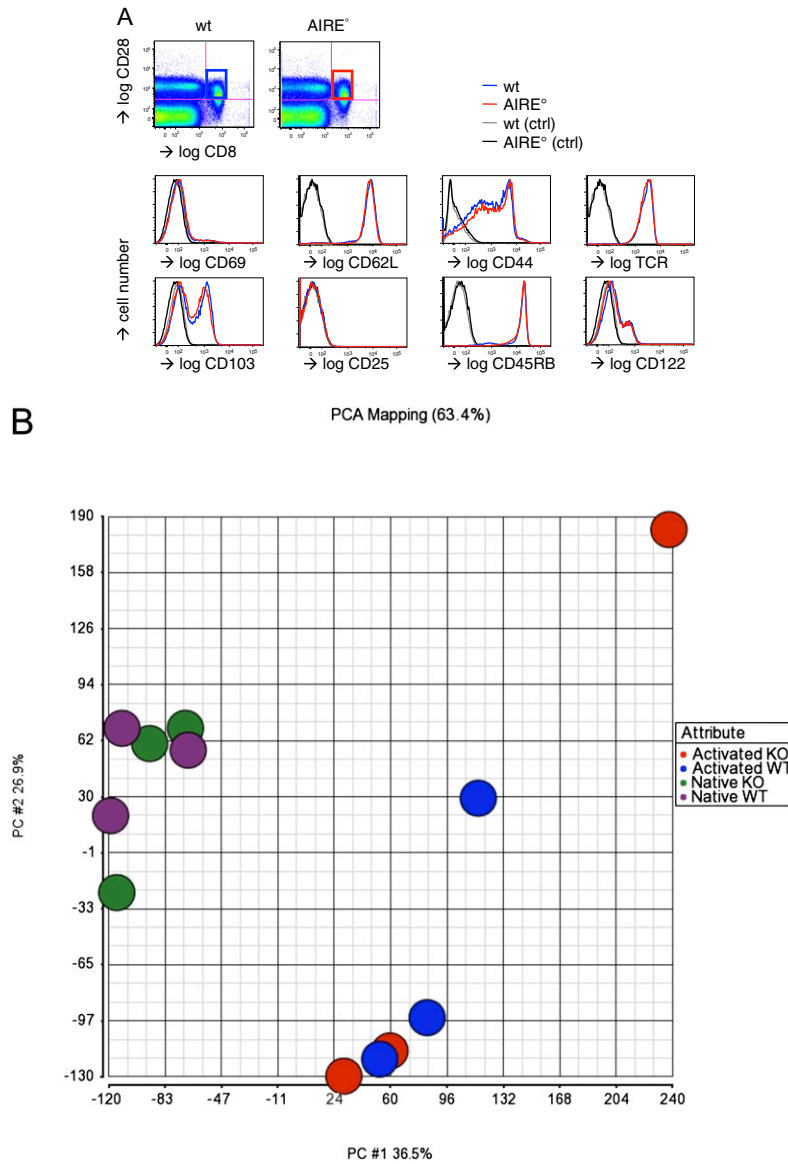

Fig. S1. (Continued)

C

MA Plot of 1/ANOVA-2way

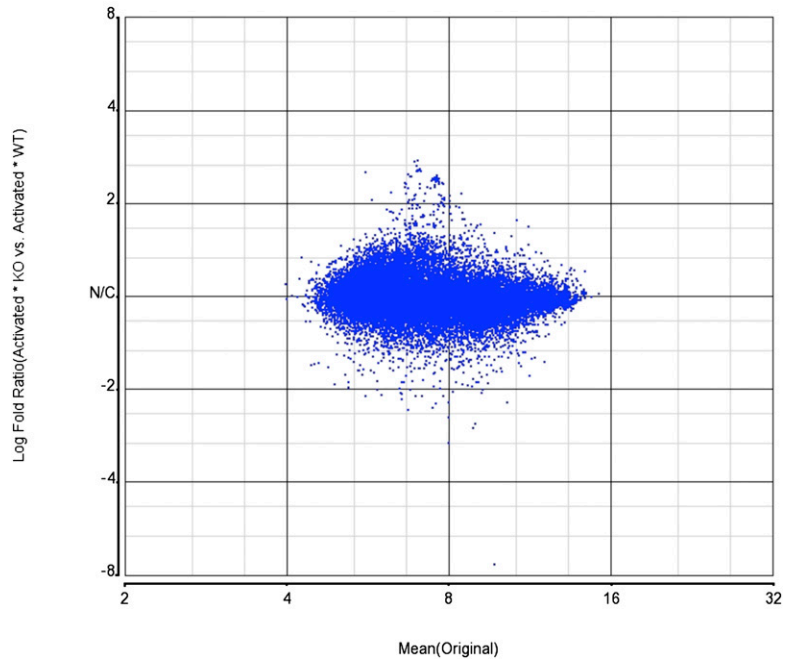

Fig. S1. (Continued)

Supplement: 1107136108_pnas.201107136SI.pdf [file 1107136108_pnas.201107136SI.pdf]
